1 ***Prevotella timonensis* degrades the vaginal epithelial glycocalyx through high fucosidase and**  
2 **sialidase activities**

3

4 Celia Segui-Perez<sup>1</sup>, Rivka de Jongh<sup>1</sup>, Robin Jonkergouw<sup>1</sup>, Paula Pelayo<sup>2</sup>, Emily P. Balskus<sup>2</sup>, Aldert  
5 Zomer<sup>1</sup>, and Karin Strijbis<sup>1\*</sup>

6

7 **Affiliations**

8 <sup>1</sup> Department of Biomolecular Health Sciences, Division of Infectious Diseases and Immunology,  
9 Faculty of Veterinary Medicine, Utrecht University, Utrecht, 3584 CL, Netherlands

10 <sup>2</sup> Department of Chemistry and Chemical Biology, Harvard University, Cambridge, MA 02138

11 <sup>3</sup> Howard Hughes Medical Institute, Harvard University, Cambridge, MA 02138\* Corresponding  
12 author, email: [K.Strijbis@uu.nl](mailto:K.Strijbis@uu.nl)

13

14 **Author contributions:** Conceptualization: CSP, KS. Methodology: CSP, AZ, EPB, KS. Investigation:  
15 CSP, RdJ, RJ, PP, AZ. Visualization: CSP, KS. Supervision: KS, EPB. Writing original draft: CSP, KS.  
16 Review & editing: CSP, RdJ, RJ, PP, AZ, EPB, KS.

17

18 **Conflicting interests:** The authors declare no conflict of interest.

19

20 **Classification:** Biological Sciences, Microbiology.

21

22 **Keywords:** vaginal microbiota, anaerobic bacteria, NanH, neuraminidase,  $\alpha$ 2,3-linked sialic acids,  
23  $\alpha$ 2,6-linked sialic acids, fucosidase, *Prevotella timonensis*, *Hoylesella timonensis*, *Prevotella bivia*

24 **Abstract**

25 Bacterial vaginosis (BV) is a polymicrobial infection of the female reproductive tract (FRT). BV is  
26 characterized by replacement of health-associated *Lactobacillus* species by diverse anaerobic bacteria,  
27 including the well-known *Gardnerella vaginalis*. *Prevotella timonensis* and *Prevotella bivia* are  
28 anaerobes that are found in a significant percentage of BV patients, but their pathogenic properties are  
29 yet to be determined. Defining characteristics of anaerobic overgrowth in BV are adherence to the  
30 mucosal surface and the increased activity of mucin-degrading enzymes such as sialidases in vaginal  
31 secretions. Here, we demonstrate that *P. timonensis* but not *P. bivia* strongly adhered to vaginal and  
32 endocervical cells to a similar level as *G. vaginalis* but did not elicit a comparable pro-inflammatory  
33 response. The *P. timonensis* genome uniquely encodes a large set of mucus-degrading enzymes  
34 including 4 putative fucosidases and 2 putative sialidases, PtNanH1 and PtNanH2. Enzyme assays  
35 demonstrated that fucosidase and sialidase activity in *P. timonensis* cell-bound and secreted fractions  
36 was significantly higher than for other vaginal anaerobes. Infection assays revealed that *P. timonensis*  
37 fucosidases and sialidases efficiently removed fucose and  $\alpha$ 2,3- and  $\alpha$ 2,6-linked sialic acid moieties  
38 from the epithelial glycocalyx. Recombinantly expressed *P. timonensis* NanH1 and NanH2 efficiently  
39 removed  $\alpha$ 2,3 and  $\alpha$ 2,6-linked sialic acids from the epithelial surface and sialic acid removal by *P.*  
40 *timonensis* could be blocked using inhibitors. This study demonstrates that *P. timonensis* has distinct  
41 virulence properties that include initial adhesion and a high capacity for mucin degradation at the  
42 vaginal epithelial mucosal surface. Our results underline the importance of understanding the role of  
43 different anaerobic bacteria in BV.

44

45 **Significance statement (Layman)**

46 Bacterial vaginosis (BV) is a common vaginal infection that affects a high percentage of women and is  
47 associated with reduced fertility and increased risk of secondary infections. *Gardnerella vaginalis* is  
48 the most well-known BV-associated bacterium, but *Prevotella* species including *P. timonensis* and *P.*  
49 *bivia* may also play an important role. We showed that, similar to *G. vaginalis*, *P. timonensis* adhered  
50 well to the vaginal epithelium, suggesting that both bacteria could be important in the first stage of  
51 infection. Compared to the other bacteria, *P. timonensis* was unique in efficiently removing the  
52 protective mucin sugars that cover the vaginal epithelium. These results underscore that vaginal bacteria  
53 play different roles in the initiation and development of BV.

## 54 Introduction

55

56 Bacterial vaginosis (BV) is a complex polymicrobial vaginal infection that is prevalent in women of  
57 different ages. BV is associated with increased susceptibility to sexually transmitted infections (STIs)  
58 including Human Immunodeficiency Virus (HIV) (1, 2) and Human Papilloma Virus (HPV) (3) but  
59 also infertility (4), and adverse pregnancy outcomes including pre-term birth (5). BV is diagnosed  
60 according to the Amsel criteria that include a high vaginal pH (>4.5), detection of thin discharge, an  
61 odor of amines after addition of potassium hydroxide, and the presence of “clue cells” in vaginal  
62 secretions (6, 7). Bacterial gram staining followed by the Nugent score test is also used to diagnose BV  
63 (8, 9). Vaginal secretions of BV patients contain enzymes that are capable of degrading the protective  
64 mucus layer including mucinases and sialidases that can also be used for diagnostics (10–12).

65

66 In contrast to BV, health-associated vaginal microbiomes are dominated by *Lactobacillus* species,  
67 including *L. crispatus*, *L. gasseri*, *L. jensenii*, and *L. iners* (13). *Lactobacillus* spp. produce  
68 antimicrobial compounds, such as lactic acid (14), hydrogen peroxide (15), bacteriocins (16), and an  
69 arginine deaminase enzyme (17), which all may help inhibit the growth of pathogenic bacteria. During  
70 BV, this protective microbiome shifts towards a higher abundance of facultative or obligate anaerobic  
71 microbes including *Gardnerella* spp., *Prevotella* spp., *Atopobium* spp., *Mobiluncus* spp., *Sneathia* spp.,  
72 and BV-associated bacteria (BVAB) 1-3 (18–20).

73

74 *G. vaginalis* is the most well-studied BV-associated anaerobe. Due to its ability to adhere to the vaginal  
75 epithelium and tolerate small amounts of oxygen, it is proposed to be an initial anaerobic colonizer that  
76 can replace resident *Lactobacillus* species (21–24). *G. vaginalis* can use glycogen, a carbon source that  
77 is abundant at the vaginal epithelium (25, 26) and degrades the protective mucus layer through the  
78 production of sialidases (27, 28). *G. vaginalis* also secretes vaginolysin (VLY), a cytotoxin capable of  
79 killing epithelial cells (29, 30). However, not all *G. vaginalis* strains are sialidase-positive and *G.*  
80 *vaginalis* is also found in healthy women (24, 31–33). Therefore *G. vaginalis* may require other species  
81 for BV initiation. *Prevotella bivia* for example produces ammonia that stimulates the growth of *G.*  
82 *vaginalis* (34). Such synergistic relationships between different vaginal anaerobes with different  
83 pathogenic properties most likely drive BV development.

84

85 The pathogenic potential of *Prevotella* species in BV is understudied in comparison to *G. vaginalis*.  
86 Previous research mainly focused on *P. bivia*, the most commonly isolated *Prevotella* species during  
87 BV (20). However, recent studies demonstrate that *P. timonensis* is also often found in women with BV  
88 (35–38). The alternative name *Hoyleseella timonensis* was recently proposed for *P. timonensis* (39). Due  
89 to the high similarity of their 16S rRNA genes, many studies could not discriminate between different  
90 *Prevotella* spp. (40). Vaginal *Prevotella* spp. in general have been associated with increased cytokine  
91 levels in the cervicovaginal fluid (41–43). Other reports suggest *Prevotella* spp. may participate in  
92 biofilm formation and mucus degradation (27, 40). We have shown that *P. timonensis*, but not *P. bivia*,  
93 induces a strong pro-inflammatory response through dendritic cell activation (44) and increases HIV-1  
94 uptake by Langerhans cells, turning these cells into HIV-1 reservoirs (45). *Prevotella* spp. have also  
95 been associated with sialidase activity in vaginal secretions of BV patients (10). *P. bivia* has sialidase  
96 activity that targets the vaginal mucus layer (27) and leads to increased adhesion of other BV-associated  
97 bacteria, including *A. vaginae* (46). *P. timonensis* also exhibited sialidase activity and altered mucin  
98 expression in the human endometrial epithelial cell line HEC1-A (40). However, the role that the  
99 different *Prevotella* strains play in BV is currently not clear. In this study, we set out to determine the  
100 pathogenic properties of *P. timonensis* compared to *P. bivia* and other BV-associated bacteria, focusing

101 on bacterial interactions with human cells and glycans. We conclude that *P. timonensis* has unique  
102 virulence traits that might play an important role during initiation and development of BV.

103  
104

## 105 **Results**

106

### 107 ***Prevotella timonensis* adheres to vaginal and endocervical cells**

108 Attachment to the vaginal epithelium is thought to be the first step towards replacement of commensal  
109 *Lactobacillus* species and colonization by bacterial anaerobes (Fig. 1A). We investigated the extent to  
110 which different BV-associated bacteria can attach to vaginal and endocervical cells and included  
111 commensal *L. crispatus* as a control. The vaginal cell line VK2/E6E7 and endocervical cell line  
112 End1/E6E7 were grown to a fully confluent monolayer followed by incubation with *L. crispatus*, *G.*  
113 *vaginalis*, *P. timonensis*, or *P. bivia* at MOI 10 in anaerobic conditions. After 18 hours, the percentage  
114 of attached bacteria was determined by colony counting. We observe that commensal *L. crispatus*  
115 adhered well to both VK2/E6E7 and End1/E6E7 cell lines, at 66% and 81% of the total bacterial  
116 inoculum, respectively, while *P. bivia* was the least adherent bacterium, with 12% attachment to  
117 VK2/E6E7 cells and 2% to End1/E6E7 cells. *G. vaginalis* and *P. timonensis* showed comparable  
118 intermediate binding, with adhesion percentages varying between 15% and 40% (Fig. 1B).

119

120 In an independent set of experiments, we assessed bacterial binding to cell surfaces by using  
121 fluorescence *in situ* hybridization (FISH). We designed specific fluorescently labeled peptide nucleotide  
122 acid (PNA) probes for *P. timonensis* (PT-Cy3) and *P. bivia* (PB-Cy3). We used a previously reported  
123 PNA probe for *G. vaginalis* (Gard162-AF488) and a general 16S probe for *L. crispatus* (EUB338-  
124 AF488). Bacteria were adhered to coated glass slides to test the specificity of the PNA probes and all  
125 four probes showed good correlation with the DAPI signal (Fig. S1). We then infected confluent  
126 VK2/E6E7 and End1/E6E7 cells with bacteria at a MOI 50 for 18 h anaerobically. The infected  
127 epithelial monolayers were stained with the FISH probes and Wheat Germ Agglutinin (WGA) to  
128 visualize the epithelial surface. We again found that *G. vaginalis* and *P. timonensis* attached more  
129 effectively to the epithelial surface compared to *P. bivia* (Fig. 1C, D). *L. crispatus* showed strong  
130 adherence to both cell lines (Fig. 1D, E). The gram-positive *L. crispatus* required a specific  
131 permeabilization buffer to achieve efficient labeling of the bacteria with the PNA probe, which led to  
132 increased WGA staining of the bacteria in addition to the epithelial cells (Fig. 1C, D). Together, these  
133 colony counting and FISH experiments demonstrate that *P. timonensis* can adhere to the surface of  
134 vaginal and endocervical monolayers, to comparable levels as the well-known BV-associated pathogen  
135 *G. vaginalis*.

136

### 137 ***P. timonensis* does not cause cell cytotoxicity and does not induce major inflammatory responses**

138 We next investigated the cytotoxic and inflammatory potential of *P. timonensis* after adhesion to  
139 VK2/E6E7 and End1/E6E7 cell lines. We infected confluent epithelial monolayers with the selected  
140 bacteria at a MOI of 10 and 100 for 18 h anaerobically and measured LDH release, an indicator of  
141 cellular cytotoxicity. As previously described, *G. vaginalis* was highly cytotoxic, resulting in an LDH  
142 release of approximately 70% of the maximum release of the total monolayer (Fig. 2A-B). Incubation  
143 with *P. timonensis*, *P. bivia*, or *L. crispatus* for 18 hours did not result in increased LDH release  
144 compared to uninfected cells (Fig. 2A-B).

145

146 To determine whether the different vaginal bacteria trigger an inflammatory response, we incubated  
147 confluent epithelial monolayers with bacteria at MOI 10 and 100 for 18 h anaerobically and measured  
148 the mRNA expression of the cytokines IL-1 $\beta$ , IL-8, CCL5, and CCL20 using quantitative RT-PCR.

149 Compared to the commensal *L. crispatus*, only *G. vaginalis* significantly increased IL-1 $\beta$ , IL-8, and  
150 CCL20 expression in both VK2/E6E7 and End1/E6E7 cells (Fig. 2C-E). CCL5/RANTES, a  
151 chemoattractant of T lymphocytes and monocytes (47) was slightly but significantly upregulated in  
152 endocervical cells incubated with *P. timonensis* and *P. bivia*, but not *G. vaginalis* (Fig. 2F). These  
153 results suggest that despite its extensive attachment to the epithelial surface, *P. timonensis* does not  
154 induce a strong inflammatory response in vaginal or endocervical cells.

155

### 156 **Utilization of glycogen and mucins as carbon sources by BV-associated bacteria**

157 Vaginal and cervical epithelial cells produce high amounts of glycogen, which is deposited onto the  
158 epithelium once epithelial cells are shed and lysed (48, 49) and can serve as a carbon source for the  
159 resident vaginal bacteria (50). We investigated whether our selected BV-associated bacteria could  
160 utilize glycogen for growth. Carbohydrates were removed from each bacterium-specific medium and  
161 supplemented with 0.5% glycogen. *P. timonensis*, *P. bivia*, and *G. vaginalis* were all able to grow on  
162 glycogen (Fig. 3A-C). Interestingly, *G. vaginalis* reached a higher OD in the basal media supplemented  
163 with glycogen compared to the complete specific media, demonstrating a preference for glycogen as  
164 carbon source (Fig. 3C). *Akkermansia muciniphila*, a member of the intestinal microbiota known to  
165 degrade mucins, did not grow on glycogen (Fig. 3D), supporting the notion that glycogen is a preferred  
166 carbon source for vaginal-associated bacteria.

167

168 The cervicovaginal mucus that covers the vaginal and endocervical epithelium facilitates uterine  
169 lubrication and microbial clearance (51). We assessed whether the BV-associated bacteria could use  
170 mucins as a carbon source by supplementing the basal media with 0.5% purified porcine gastric mucins  
171 (PGM). *A. muciniphila* grew well on mucins (Fig. 3D), but *P. bivia* and *G. vaginalis* did not exhibit  
172 increased growth on mucins compared to the basal medium without carbohydrates (Fig. 3B, C). *P.*  
173 *timonensis* showed a small but significant increase in growth in the mucin-containing medium  
174 compared to the basal medium without carbohydrates (Fig. 3A), suggesting that *P. timonensis* might  
175 degrade and utilize mucins.

176

### 177 **The genome of *P. timonensis* predicts a high O-glycan degradation potential**

178 To determine the genetic potential of *P. timonensis* and the other BV-associated bacteria to degrade  
179 different carbon sources, we sequenced the *P. timonensis*, *P. bivia*, *G. vaginalis*, and *A. muciniphila*  
180 strains used in this study (sequences deposited in PRJEB67799). The genomes were analyzed for the  
181 presence of carbohydrate-active enzymes (CAZymes) using the dbCAN2 meta server pipeline for  
182 automated CAZyme annotation (52). Only CAZyme genes that were predicted by at least two out of  
183 three annotation tools were selected. Detected CAZyme genes included glycoside hydrolases (GH),  
184 carbohydrate esterases (CE), glycosyl transferases (GT), carbohydrate-binding modules (CBM), and  
185 auxiliary activities (AA). The mucin degrader *A. muciniphila* presented the highest amount of putative  
186 CAZy domains (155 ORFs), followed by *P. timonensis* with 104 ORFs, *P. bivia* with 71 ORFs, and *G.*  
187 *vaginalis* with 40 ORFs (Fig. 4A).

188

189 We next examined these results to identify candidate enzymes for degradation of specific substrates.  
190 Mucins have polypeptide backbones that are decorated by complex O-linked glycan structures that  
191 require sequential degradation by glycoside hydrolases with high specificity (Fig. 4B). Within the  
192 glycoside hydrolase category, several genes encoding predicted sialidases (GH33 class) and fucosidases  
193 (GH29 and GH95 classes) were detected in the genomes of all four bacteria (Fig. 4C). Furthermore, *P.*  
194 *timonensis* and *A. muciniphila* possessed a great number of predicted  $\alpha/\beta$ -galactosidases,  $\alpha/\beta$ -N-  
195 acetylgalactosaminidases, and  $\alpha/\beta$ -N-acetylglucosaminidases, enzymes that hydrolyze the glycosidic  
196 linkages underlying the terminal sialic acids and fucoses (Fig. 4C). Many of these putative CAZymes

197 contained a signal peptide, suggesting that the proteins may be translocated to the bacterial surface or  
198 secreted into the environment (Fig. 4C).

199

200 Sialic acids and fucoses cap mucin *O*-glycan structures and are the first monosaccharides that need to  
201 be removed for further mucin degradation (53). The fucosidase family consists of the retaining  
202 fucosidases (GH29) and inverting fucosidases (GH95). The *P. timonensis* genome uniquely encoded a  
203 predicted GH95 enzyme in addition to three GH29-containing fucosidases. The *P. bivia* and *G.*  
204 *vaginalis* genomes encoded two and one predicted GH29 enzymes, respectively (Fig. 4D). The *P.*  
205 *timonensis* genome encoded two predicted sialidases with a GH33 domain and signal peptides with  
206 different domain structures. The NanH1 sialidase is predicted to be 412 amino acids in length and  
207 NanH2 is a much larger protein with 1029 amino acids. Both *P. timonensis* sialidases are likely secreted  
208 enzymes as they have predicted signal peptides. In an accompanying paper, Pelayo et al., biochemically  
209 characterize these two *P. timonensis* sialidases, establishing their activity. The *G. vaginalis* genome  
210 encoded two predicted sialidases (NanH1 and NanH3, NanH2 was not present in our *Gardnerella*  
211 strain) and a single GH33 sialidase (NanH) was predicted for *P. bivia* (Fig. 4E). Earlier studies showed  
212 that *G. vaginalis* NanH2 and NanH3, but not NanH1, had high activity towards 4-methylumbelliferyl  
213 *N*-acetyl- $\alpha$ -D-neuraminic acid (4-MU-Neu5Ac) and bovine submaxillary mucin (54). These studies  
214 underpin the importance of studying enzyme activity. Altogether, our genomic analysis suggests that  
215 *P. timonensis* has a larger repertoire of potential mucin-degrading enzymes compared to the other BV-  
216 associated bacteria including multiple fucosidases and sialidases.

217

### 218 ***P. timonensis* displays high fucosidase and sialidase activity on the bacterial surface and in the** 219 **supernatant**

220 Sialidase and fucosidase activity in bacteria are often associated with pathogenic behavior as the  
221 removal of terminal monosaccharides from the mucin *O*-glycan structure promotes further degradation  
222 by exposing underlying glycans and the mucin peptide backbone that is sensitive to proteases (53). To  
223 assess the presence of sialidase and fucosidase activities in our vaginal bacterial strains we performed  
224 culture-based assays. We also included *Bacteroides fragilis* as a positive control, an intestinal bacterium  
225 that is sometimes associated with vaginitis (55) and pelvic inflammatory disease (56, 57), and is known  
226 to have sialidase and fucosidase activity. Bacteria were grown overnight followed by centrifugation to  
227 separate the pellet from the supernatant fraction. To determine fucosidase and sialidase activities, both  
228 fractions were incubated with fluorescent substrates and the produced fluorescence by each enzyme  
229 was measured.

230

231 No fucosidase activity was detected for *G. vaginalis* and *L. crispatus*, which was surprising as the *G.*  
232 *vaginalis* genome does encode a GH29 fucosidase (Fig. 4D). *P. timonensis*, *P. bivia*, and *B. fragilis*, all  
233 displayed high fucosidase activity in the bacterial pellet. In addition, fucosidase activity was detectable  
234 in the supernatants of *P. timonensis* and *P. bivia*, but only reached statistical significance in the case of  
235 *P. timonensis* compared to the fucosidase-negative *G. vaginalis* supernatant (Fig. 4F). For sialidase  
236 activity, the highest cell-bound activity could be measured for *P. timonensis* and *P. bivia* followed by  
237 *G. vaginalis* and *B. fragilis*. Both *P. timonensis* and *P. bivia* sialidase activities were significantly higher  
238 than those of *G. vaginalis*. Of the supernatant fractions, only that of *P. timonensis* contained detectable  
239 sialidase activity, suggesting that this bacterium secreted sialidases into the medium under the  
240 conditions tested (Fig. 4G).

241

### 242 ***P. timonensis* sialidase and fucosidase activity leads to *O*-glycan degradation at the vaginal surface**

243 Next, we determined the *O*-glycan-degrading capacity of vaginal bacteria at the vaginal epithelial  
244 surface. Vaginal VK2/E6E7 monolayers were incubated with bacteria for 18 h and stained with lectins

245 to detect different mucin glycan structures including fucoses (UEA-1),  $\alpha$ 2,3 sialic acids (MAL-II), and  
246  $\alpha$ 2,6 sialic acids (SNA). Visualization by confocal microscopy demonstrated that all glycan structures  
247 were present on the vaginal epithelial surfaces in the absence of bacteria (Fig. 5A-D, top panels). UEA-  
248 1 staining was significantly reduced after incubation with *P. timonensis* and *G. vaginalis* demonstrating  
249 removal of fucose residues, but not after incubation with *P. bivia* and *L. crispatus* (Fig. 5A, D). This  
250 result indicated that the *G. vaginalis* fucosidase is active and is perhaps induced after interaction with  
251 vaginal epithelial cells. Incubation with *P. timonensis* significantly decreased the staining for  $\alpha$ 2,3 sialic  
252 acids and  $\alpha$ 2,6 sialic acids on the vaginal epithelial surface (Fig. 5B-D). Reduction of MAL-II, but not  
253 SNA, staining was also observed after incubation with *G. vaginalis*, but to a lesser extent than *P.*  
254 *timonensis* (Fig. 5B-D). *P. bivia* and *L. crispatus* did not significantly reduce sialic acid staining (Fig.  
255 5B-D). Overall, these results show that *P. timonensis* efficiently removes sialic acids and fucoses from  
256 the vaginal epithelium.

257  
258 To investigate if the two *P. timonensis* sialidases (PtNanH1 and PtNanH2) could remove sialic acids  
259 from the epithelial surface, we incubated the vaginal monolayers with recombinantly expressed and  
260 purified PtNanH1 and PtNanH2. Incubation with either enzyme led to a significant reduction of both  
261 MAL-II and SNA (Fig. 6A-C). Next, vaginal epithelial monolayers were incubated with *P. timonensis*  
262 in the presence of either the broad sialidase inhibitor DANA or Zanamivir, an inhibitor that was found  
263 in the accompanying study to be effective toward *P. timonensis* sialidases. In the presence of DANA or  
264 Zanamivir, removal of  $\alpha$ 2,3 sialic acids and  $\alpha$ 2,6 sialic acids from the vaginal epithelial surface by *P.*  
265 *timonensis* was significantly reduced, demonstrating efficient inhibition of the bacterial sialidases and  
266 highlights the role of these enzymes in glycan degradation (Fig. 6D-F). In conclusion, the BV-  
267 associated bacterium *P. timonensis* has a high potential for *O*-glycan degradation at the vaginal  
268 epithelial mucosal surface through a diverse array of glycogen hydrolases including highly active  
269 sialidases.

270

271

## 272 Discussion

273

274 BV is one of the most common pathological conditions in women of different ages that increases  
275 susceptibility to sexual transmitted infections and negatively impacts fertility and quality of life. Unlike  
276 the health-associated vaginal microbiome, which is dominated by *Lactobacillus* species, BV is  
277 characterized by a polymicrobial infection of different anaerobes including *G. vaginalis*, *A. vaginae* and  
278 different *Prevotella* species (Fig. 1A). High sialidase activity can be detected in the vaginal discharge  
279 of women with BV (10–12) and persistence of sialidase-positive bacteria is a risk factor for subclinical  
280 intrauterine infections and preterm birth (58).

281

282 Thus far, *G. vaginalis* and *P. bivia* were considered to be the main producers of sialidases in the  
283 cervicovaginal environment (59–62). In this study and the accompanying paper by Pelayo et al., we  
284 demonstrate that *P. timonensis* has high sialidase activity and should be considered amongst the bacteria  
285 that play a pivotal role in the initiation and progression of BV. We found that *P. timonensis* had the  
286 highest sialidase activity of the BV-associated bacterial strains tested. In addition to cell-bound sialidase  
287 activity, *P. timonensis* was the only bacterium with detectable secreted sialidase activity (Fig. 4G). After  
288 attachment to vaginal epithelial cells, *P. timonensis* removed the majority of surface  $\alpha$ 2-3-linked and  
289  $\alpha$ 2-6-linked sialic acids (Fig. 5B-C), and the two identified *P. timonensis* sialidases (PtNanH1 and  
290 PtNanH2) were highly active at removing sialic acids from the vaginal epithelial cell surface (Fig. 6 D-  
291 F). Notably, the sialidase activity of *P. timonensis* at the vaginal epithelial surface could be blocked

292 with DANA and Zanamivir inhibitors (Fig. 6A-C). In addition to sialidase activity, *P. timonensis* also  
293 displayed fucosidase activity in culture and during attachment to the vaginal epithelium (Fig. 4F, 5A).  
294 Sialidases and fucosidases are essential enzymes that can initiate degradation of mucin O-glycan  
295 structures of secreted and epithelium-bound mucins. The removal of sialic acids renders mucins more  
296 vulnerable to further degradation by glycosyl hydrolases and proteases (63). A recent paper showed that  
297 recombinant sialidases of *Gardnerella* species led to desialylation of glycans in VK2/E6E7 and induced  
298 pathways of cell death, differentiation, and inflammatory responses (64). Therefore, these enzymes are  
299 important virulence factors that can contribute to the establishment and development of BV.

300  
301 Investigating bacterial nutritional preference for cervicovaginal mucus and glycogen is important to  
302 understand how different members of the vaginal microbiome thrive in this unique environment.  
303 Sialidases and fucosidases are crucial for bacterial growth on mucin (65). Besides these enzymes, *P.*  
304 *timonensis* also encoded a wide array of other mucin-degrading enzymes (Fig. 4A, C) and showed a  
305 small but significant growth on mucins as the sole carbon source (Fig. 3A-D). *G. vaginalis* and *P. bivia*  
306 encode fewer mucin-degrading enzymes (Fig. 4A, C) and did not grow in mucin-enriched media (Fig.  
307 3B-C). For these experiments, we used pig gastric mucus (PGM) containing 5-N-glycolylneuraminic  
308 acid (Neu5Gc) (66). This mucus might be less suitable for human microbiota as human mucus does not  
309 contain Neu5Gc and it was previously suggested that *G. vaginalis* is not capable of degrading Neu5Gc  
310 (61). Therefore, future experiments should be conducted with human (vaginal) mucus to conclusively  
311 establish the growth capacities of the different vaginal microbiota on cervicovaginal mucus. Glycogen  
312 is a large, highly branched D-glucose polymer that is abundant in vaginal tissue (48, 67) but present at  
313 reduced levels in women with BV (68–70). Several *Lactobacillus* spp. have been shown to directly use  
314 glycogen for growth (71, 72). Here we show that *P. timonensis*, *G. vaginalis*, and *P. bivia* were all able  
315 to grow on glycogen as single nutrient source, which is in line with the presence of  $\alpha$ -glucosidases in  
316 their genomes (25, 50). Overall, glycogen utilization seems to be a shared trait of vagina-associated  
317 bacteria, indicating their adaptation to the vaginal environment.

318  
319 Adhesion to the cell epithelium is a crucial step in BV and many studies in the field indicate a stepwise  
320 disease progression with primary and secondary bacterial colonizers (Fig. 1A). *G. vaginalis* is an  
321 important primary colonizer as this bacterium can adhere to the vaginal epithelium and potentially form  
322 a biofilm (21–24). Other anaerobic bacteria such as *P. bivia* and *A. vaginae*, can join the *G. vaginalis*  
323 biofilm as secondary colonizers (46, 73, 74). In the current study, we demonstrate that *P. timonensis*,  
324 similar to *G. vaginalis* but unlike *P. bivia*, can efficiently bind to both vaginal and endocervical cells  
325 (Fig. 1B, D, E). Previously, it has been shown that *P. timonensis* can induce elongated microvilli in a  
326 3D endometrial epithelial cell model, and it was speculated that these changes might induce increased  
327 adhesion of this species and of other secondary colonizers (40). Based on these combined observations,  
328 we propose that *P. timonensis* may be an initial colonizer of the vaginal epithelium and does not require  
329 an established *G. vaginalis* biofilm. After attachment, the high sialidase and fucosidase activity of *P.*  
330 *timonensis* at the vaginal epithelial surface removes the protective terminal glycans of the glycocalyx  
331 likely creating new binding sites for secondary colonizers (64, 75) and enhancing bacterial colonization  
332 of the upper parts of the FRT (76).

333  
334 While *P. timonensis* is perhaps an initial colonizer during BV, it does not contribute to cytotoxicity nor  
335 did it induce a pro-inflammatory response in a similar manner to *G. vaginalis*. Only *G. vaginalis* induced  
336 high LDH release by both vaginal and endocervical cells while *P. timonensis*, *P. bivia*, and *L. crispatus*  
337 were not cytotoxic (Fig. 2A, B). To induce cytotoxicity, *G. vaginalis* expresses the cytotoxin  
338 vaginolysin (vly) (29, 30) and also utilizes membrane vesicles (77). Cytotoxicity might be an important  
339 aspect of *G. vaginalis* virulence, as strains isolated from women with BV were more cytotoxic than



340 non-BV isolates (33). In our infection experiments with single species of bacteria, *G. vaginalis* strongly  
 341 induced expression of IL-1 $\beta$ , IL-8, or CCL20 in vaginal and endocervical epithelium while *P.*  
 342 *timonensis*, *P. bivia*, and *L. crispatus* did not significantly induce pro-inflammatory cytokines (Fig. 2C-  
 343 E), which was in line with previous reports that investigated single species (40, 78, 79). Therefore, the  
 344 current data suggest that *P. timonensis* by itself is not a promoter of BV-associated inflammation as has  
 345 been observed for *G. vaginalis* and *A. vaginae* (79, 80). Because *in vivo* observations in cervicovaginal  
 346 fluid indicate increased cytokine levels when *Prevotella* spp. are present in the vagina (41, 42), the  
 347 contributions of different *Prevotella* species to pro-inflammatory responses in more complex  
 348 polymicrobial infections remain to be established.

349

350 This study provides evidence that the understudied vaginal bacteria *P. timonensis* has pathogenic  
 351 properties that could support primary colonization of the female reproductive tract in BV. Unlike *G.*  
 352 *vaginalis*, the virulence traits of *P. timonensis* do not include cell cytotoxicity nor triggering of a strong  
 353 pro-inflammatory response but rather a strong and previously unappreciated capacity to degrade the  
 354 protective epithelial mucus layer through sialidase and fucosidase activity. We also demonstrate that  
 355 the *P. timonensis* sialidase activity at the vaginal epithelial glycocalyx can be efficiently inhibited by  
 356 small molecule inhibitors. For *G. vaginalis*, it was previously demonstrated that a sialidase inhibitor  
 357 also reduced cellular invasion (81). The application of sialidase inhibitors in BV treatment might  
 358 therefore be an interesting novel therapeutic approach to reduce bacterial adhesion, invasion and  
 359 mucosal damage.

360

361

## 362 **Materials and Methods**

363

### 364 **Cell lines, bacterial strains, and culture conditions**

365 VK2/E6E7 (ATCC, CRL-2616) and End1/E6E7 (ATCC, CRL-2615) cells were routinely grown and  
 366 maintained as indicated in the supplementary materials. The bacterial strains used in this study are listed  
 367 in Table 1. Bacterial media and growing conditions can be found in the supplementary materials.

368

369 *Table 1. Overview of bacterial strains used in this study.*

| Species                                                       | Strain     | Isolation site   | Growth medium | Plate medium                       | Taxonomy ID | Reference            |
|---------------------------------------------------------------|------------|------------------|---------------|------------------------------------|-------------|----------------------|
| <i>Prevotella timonensis</i> ( <i>Hoylesella timonensis</i> ) | CRIS 5C-B1 | Human vagina     | CMM           | Chocolate, bioTRADING (K516P090KP) | 679189      | BEI resources, n. d. |
| <i>Prevotella bivia</i>                                       | DSM 20514  | Endometrium      | CMM           | NYC                                | 868129      | DSMZ                 |
| <i>Gardnerella vaginalis</i>                                  | CCUG 72422 | Human vagina     | NYC           | NYC                                | n/a         | CCUG                 |
| <i>Lactobacillus crispatus</i>                                | RL10       | Human vagina     | MRS           | MRS                                | n/a         | NCCB 100715          |
| <i>Bacteroides fragilis</i>                                   | ATCC 25285 | Appendix abscess | NYC           | NYC                                | n/a         | ATCC                 |
| <i>Akkermansia muciniphila</i>                                | IMS 1-22   | Human feces      | MM            | MM                                 | n/a         | In house             |

370

371 **Adhesion assay**

372 VK2/E6E7 and End1/E6E7 cells were seeded in a 12-well plate and grew until full confluency. Cells  
373 were infected with overnight bacterial cultures at a MOI of 10 for 18 h in anaerobic conditions. Serial  
374 dilutions from the supernatant and cell suspensions were plated in their specific plate media. Colonies  
375 were counted to calculate the percentage of adherent bacteria, as described in the supplementary  
376 methods.

377

378 **Peptide nucleotide acid (PNA) probe in-silico design**

379 PNA probes for the specific detection of *P. timonensis* or *P. bivia* were designed using the protocol  
380 described in detail in the supplementary materials. The resulting PNA probes were named PT-Cy3 and  
381 PB-Cy3. The Gard162-AF488 (82) and EUB338-AF488 (83) PNA probes used in this study have been  
382 previously described. All probes are listed in Table 2.

383

384 *Table 2. Sequences of the PNA/FISH probes.*

| Probe         | Sequence                                 | T <sub>M</sub> | Working concentration |
|---------------|------------------------------------------|----------------|-----------------------|
| PT-Cy3        | 5'-Cy3/GCC TAC TTC CTG CAT ACT CA-3'     | 54°C           | 200 nM                |
| PB-Cy3        | 5'-Cy3/CCA AAC GGC CTA CGC TC-3'         | 56.5°C         | 200 nM                |
| Gard162-AF488 | 5'-Alexa488N/CAG CAT TAC CAC CCG-3'      | 49.8°C         | 600 nM                |
| EUB338-AF488  | 5'- GCT GCC TCC CGT AGG AGT-3/Alexa488N' | 59.4°C         | 1000 nM               |

385

386 **Fluorescence In Situ Hybridization (FISH) and confocal microscopy**

387 Briefly, confluent monolayers of VK2/E6E7 and End1/E6E7 cells were infected with *G. vaginalis*, *P.*  
388 *timonensis*, or *P. bivia* at a MOI of 50 for 18 h at 37°C in anaerobic conditions. Cells were washed and  
389 stained with Wheat Germ Agglutinin-663 (WGA-633, Invitrogen, W21404). Then, cells were fixed and  
390 stained with 1000 nM EUB338-AF488 probe, 600 nM Gard162-AF488 probe, 200 nM PT-Cy3, or 200  
391 nM PB-Cy3 probe in hybridization buffer for 2 h at 50°C in a humidity chamber. Slides were washed,  
392 stained with DAPI, and mounted for imaging on a Leica SPE-II confocal microscope. Additional details  
393 of the FISH staining protocol can be found in the supplementary materials.

394

395 **Lectin staining and confocal microscopy**

396 For infection experiments and *O*-glycan analysis, epithelial cells were grown and infected with bacteria  
397 as described under the FISH protocol. Cells were treated with 200 U/mL of  $\alpha$ 2,3,6,8,9 neuraminidase  
398 A (NEB Bioke, P0722L) and 0.6 U of  $\alpha$ 1,2,3,4,6-L- fucosidase (Megazyme, E-FUCHS) for 3 h as  
399 positive controls for sialidase and fucosidase activity. Cells were incubated with lectins Sambucus Nigra  
400 Lectin biotinylated (SNA) at 1:200, Maackia Amurensis Lectin II biotinylated (MAL-II) at 1:100, and  
401 Ulex Europaeus Agglutinin I (UEA-1) at 1:100, followed by incubation with Streptavidin-488 at 1:100  
402 and DAPI at 1:1000. Slides were washed and mounted for imaging on a Leica SPE-II confocal  
403 microscope.

404

405 **Cytotoxicity assays**

406 VK2/E6E7 and End1/E6E7 cells were grown until full confluency in 96-well plates. Overnight cultures  
407 of *P. timonensis*, *P. bivia*, *G. vaginalis*, and *L. crispatus* were used to infect the cells at a MOI of 10  
408 and 100 for 18 h under anaerobic conditions. The presence of released LDH in the supernatant was

409 assessed using the Cytotox 96 Non-Radioactive Cytotoxicity Assay (Promega, G1780). The extended  
410 protocol can be found in the supplementary materials.

411

#### 412 **Reverse transcription quantitative polymerase chain reaction (RT-qPCR)**

413 Non-confluent VK2/E6E7 and End1/E6E7 cells were infected with *G. vaginalis*, *P. timonensis*, or *P.*  
414 *bivia* at a MOI of 10 for 18 h at 37°C in anaerobic conditions. RNA was extracted and treated with  
415 DNase I. Primers used in the RT-qPCR reactions can be found in Table 3. All cycle thresholds were  
416 averaged from triplicate reactions and normalized to the housekeeping gene TMEM222. Fold changes  
417 were calculated using the delta-delta Ct method. Additional details of bacterial infection and RT-qPCR  
418 protocols can be found in the supplementary materials.

419

420 *Table 3. Primer sequences for RT-qPCR. F: forward primer; R: reverse primer.*

| Gene         | Protein                          | Primer sequences                                       |
|--------------|----------------------------------|--------------------------------------------------------|
| TMEM222      | Transmembrane protein 222        | (F) TCTACGGGAAGTACGTCAGC<br>(R) CCATCACCGGAGGTAAAGACC  |
| IL-1 $\beta$ | Interleukin 1 beta               | (F) AGTACCTGAGCTCGCCAGTG<br>(R) GGTCCTGGAAGGAGCACTTCAT |
| CCL20/MIP3A  | Chemokine C-C motif ligand<br>20 | (F) GCGAATCAGAAGCAGCAAGC<br>(R) GCCGTGTGAAGCCCACAATA   |
| IL-8         | Interleukin 8                    | (F) CTGGCCGTGGCTCTCTTG<br>(R) CCTTGGCAAACACTGCACCTT    |
| CCL5/RANTES  | Chemokine C-C motif ligand 5     | (F) CCCAGCAGTCGTCTTTGTCA<br>(R) TCCCGAACCCATTTCTTCTCT  |

421

#### 422 **Mucin and glycogen growth assays**

423 Mucins were purified from commercially available porcine gastric mucins (PGM, Sigma-Aldrich,  
424 M2378) as described in the supplementary materials. Bacterial cultures of *P. timonensis*, *P. bivia*, *G.*  
425 *vaginalis*, and *A. muciniphila* were diluted to OD<sub>600</sub> = 0.02 in their respective medium without  
426 carbohydrates. In a 24-well plate, diluted bacterial cultures were mixed 1:1 with their corresponding  
427 medium without carbohydrates, supplemented with purified mucins or glycogen (Sigma-Aldrich,  
428 10901393001) at a final concentration of 0.5% w/v. As a positive control, complete medium with  
429 carbohydrates was used. The cultures were incubated in anaerobic conditions for up to 56 h at 37°C.  
430 During incubation, absorbance of 100  $\mu$ L of each culture was measured at 595 nm with the FLUOstar  
431 Omega microplate reader at 24, 32, 48, and 56 h for *P. timonensis* and *A. muciniphila*, and at 16, 24,  
432 40, and 48 h for the faster-growing bacteria *P. bivia* and *G. vaginalis*.

433

#### 434 **Bacterial whole genome sequencing and CAZyme analysis**

435 Bacterial DNA was isolated and sequenced using Nanopore technology. Detailed information can be  
436 found in the supplementary materials. Predicted bacterial protein sequences were used to analyze the  
437 presence of carbohydrate-active enzymes using the CAZy database and dbCAN3 meta server.  
438 CAZymes identified with at least two out of three tools (HMMER: dbCAN, DIAMOND: CAZy, and  
439 HMMER: dbCAN\_sub) were considered for further analysis.

440

#### 441 **Enzymatic activity assays**

442 Fucosidase and sialidase activities were measured in overnight bacterial pellets and concentrated  
443 supernatants using fluorogenic substrates 4-Methylumbelliferyl  $\alpha$ -L-fucopyranoside and 4-

444 Methylumbelliferyl N-acetyl-a-D-neuraminic acid sodium salt, respectively. The detailed enzyme assay  
445 protocols can be found in the supplementary materials.

446

#### 447 **Cloning, heterologous expression, and purification of *P. timonensis* sialidase genes**

448 Full-length sialidase genes were amplified from genomic DNA purifications using primer pairs depicted  
449 in Table 4. The resulting gene products were assembled into pET28a expression vector and transformed  
450 into DH5 $\alpha$  *Escherichia coli* chemically competent cells. Confirmed plasmids were transformed into *E.*  
451 *coli* BL21 (DE3) for protein expression. A more extensive detailed protocol can be found in the  
452 supplementary materials.

453

454 *Table 4. Primer sequences for the cloning of P. timonensis sialidase genes.*

| Primer        | Gene                                            | Primer sequence                                      |
|---------------|-------------------------------------------------|------------------------------------------------------|
| <b>oPP_07</b> | <i>P. timonensis</i> CRIS 5C-B1 sialidase NanH2 | cacagcagcggcctggtgccgcgcggcagcGCGGACAAGGTAATCCGCATTC |
| <b>oPP_08</b> | <i>P. timonensis</i> CRIS 5C-B1 sialidase NanH2 | gcagccaactcagcttcctttcgggctttgTACTTCACCACCACCTTTTTG  |
| <b>oPP_09</b> | <i>P. timonensis</i> CRIS 5C-B1 sialidase NanH1 | cacagcagcggcctggtgccgcgcggcagcTCAAACAACCAGCATCACCAAC |
| <b>oPP_10</b> | <i>P. timonensis</i> CRIS 5C-B1 sialidase NanH1 | gcagccaactcagcttcctttcgggctttgTTAGTAGCCCTTCTTGAAGCGT |

455

#### 456 **Acknowledgements**

457 We thank Prof. dr. ir. Remco Kort (Vrije Universiteit, the Netherlands) for providing the *L. crispatus*  
458 strain and the group of Prof. dr. Piet Cools (University Ghent, Belgium) for providing the *G. vaginalis*  
459 strain and for expert advice. We thank Jos P.M. van Putten for advice and support throughout the  
460 project. This research is supported by a ZonMW TOP grant that was awarded to K. Strijbis and T.  
461 Geijtenbeek (grant number 91218017). K. Strijbis has received funding from the European Research  
462 Council (ERC) under the European Union's Horizon 2020 research and innovation program (ERC-  
463 2019-STG 852452).

464

465 **Figures**  
466

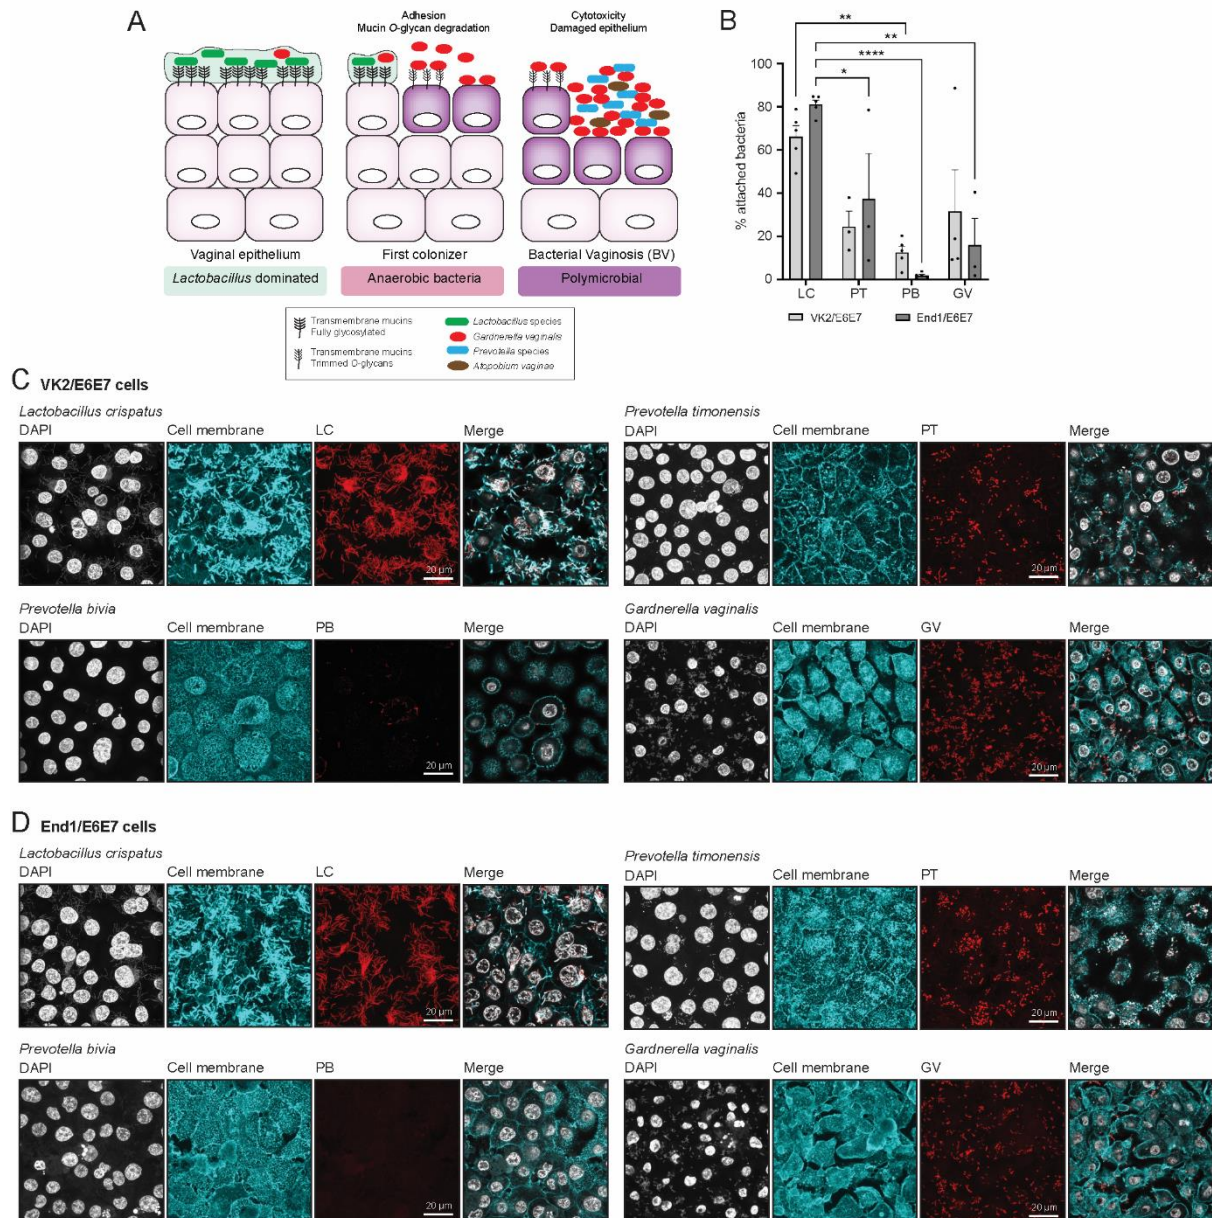

467  
468  
469  
470  
471  
472  
473  
474  
475  
476  
477  
478

**Figure 1. *Prevotella timonensis* can adhere to the vaginal and endocervical epithelium.** (A) Schematic representation of the different microbial communities of the vaginal epithelium in the healthy state and during the development of bacterial vaginosis. (B) Percentage of adhesion of *L. crispatus* (LC), *P. timonensis* (PT), *P. bivia* (PB), and *G. vaginalis* (GV) to VK2/E6E7 and End1/E6E7 cells assessed by quantification of colony forming units (CFUs). The graph represents the average and SEM of at least 3-4 independent experiments. (C, D) FISH in combination with confocal microscopy of *L. crispatus*, *P. timonensis*, *P. bivia*, and *G. vaginalis* adhesion to (C) VK2/E6E7 and (D) End1/E6E7 cells stained for WGA and using PNA probes. For each bacterium, the corresponding PNA signal is shown in red, cell surface in cyan (WGA), and DAPI in white. White scale bars represent 20 μM.

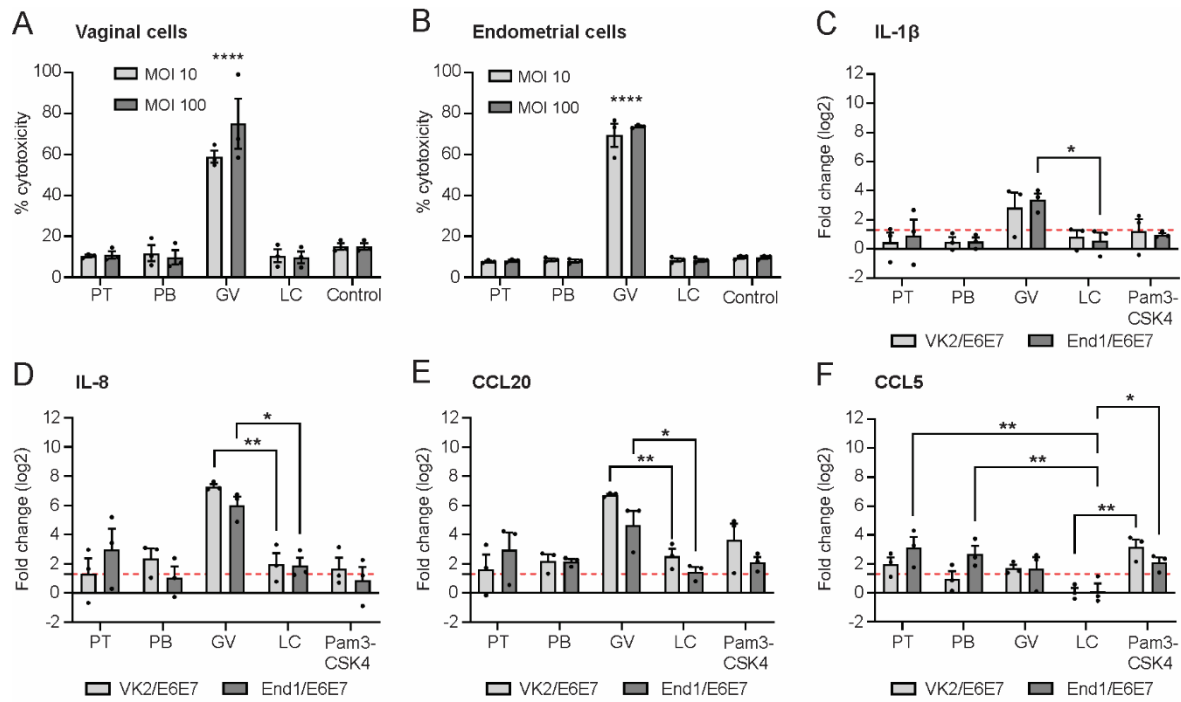

479  
 480

481 **Figure 2. *Prevotella timonensis* does not induce cellular cytotoxicity nor is it highly inflammatory.**  
 482 LDH release of (A) VK2/E6E7 and (B) End1/E6E7 cells after 18 h infection with *P. timonensis* (PT),  
 483 *P. bivia* (PB), *G. vaginalis* (GV), or *L. crispatus* (LC) at MOI 10 and 100. (C-F) RT-qPCR analysis of  
 484 VK2/E6E7 and End1/E6E7 cell lines incubated with *P. timonensis* (PT), *P. bivia* (PB), *G. vaginalis*  
 485 (GV), or *L. crispatus* (LC) at MOI 10 demonstrating expression of (C) IL-1 $\beta$ , (D) IL-8, (E) CCL20, and  
 486 (F) CCL5. TMEM222 was used as the reference gene. As a positive control, cells were stimulated with  
 487 the TLR ligand Pam3CSK4 to induce expression of pro-inflammatory cytokines. The red dotted line  
 488 marks significant upregulation compared to non-infected cells. The graph represents the average and  
 489 +/- SEM of at least three independent experiments.

490

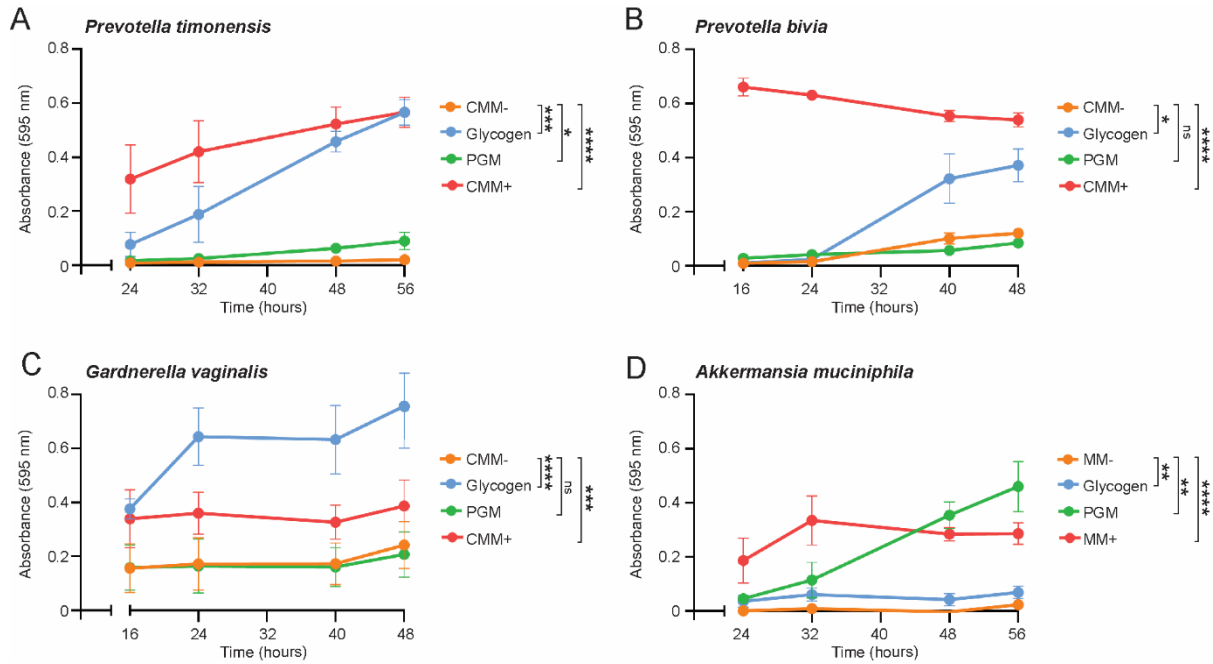

491

492

493 **Figure 3. Utilization of glycogen and mucins as carbon sources by BV-associated bacteria.**

494 Growth of (A) *P. timonensis*, (B) *P. bivia*, (C) *G. vaginalis*, and mucin-degrader *Akkermansia*  
 495 *muciniphila* (D), on basal medium without carbohydrates (CMM- or MM-), basal medium  
 496 supplemented with 0.5% glycogen, basal medium supplemented with 0.5% purified porcine gastric  
 497 mucins (PGM), or complete medium with carbohydrate (CMM+ or MM+) for up to 56 hours. The graph  
 498 represents the average and +/- SEM of at least three independent experiments.

499

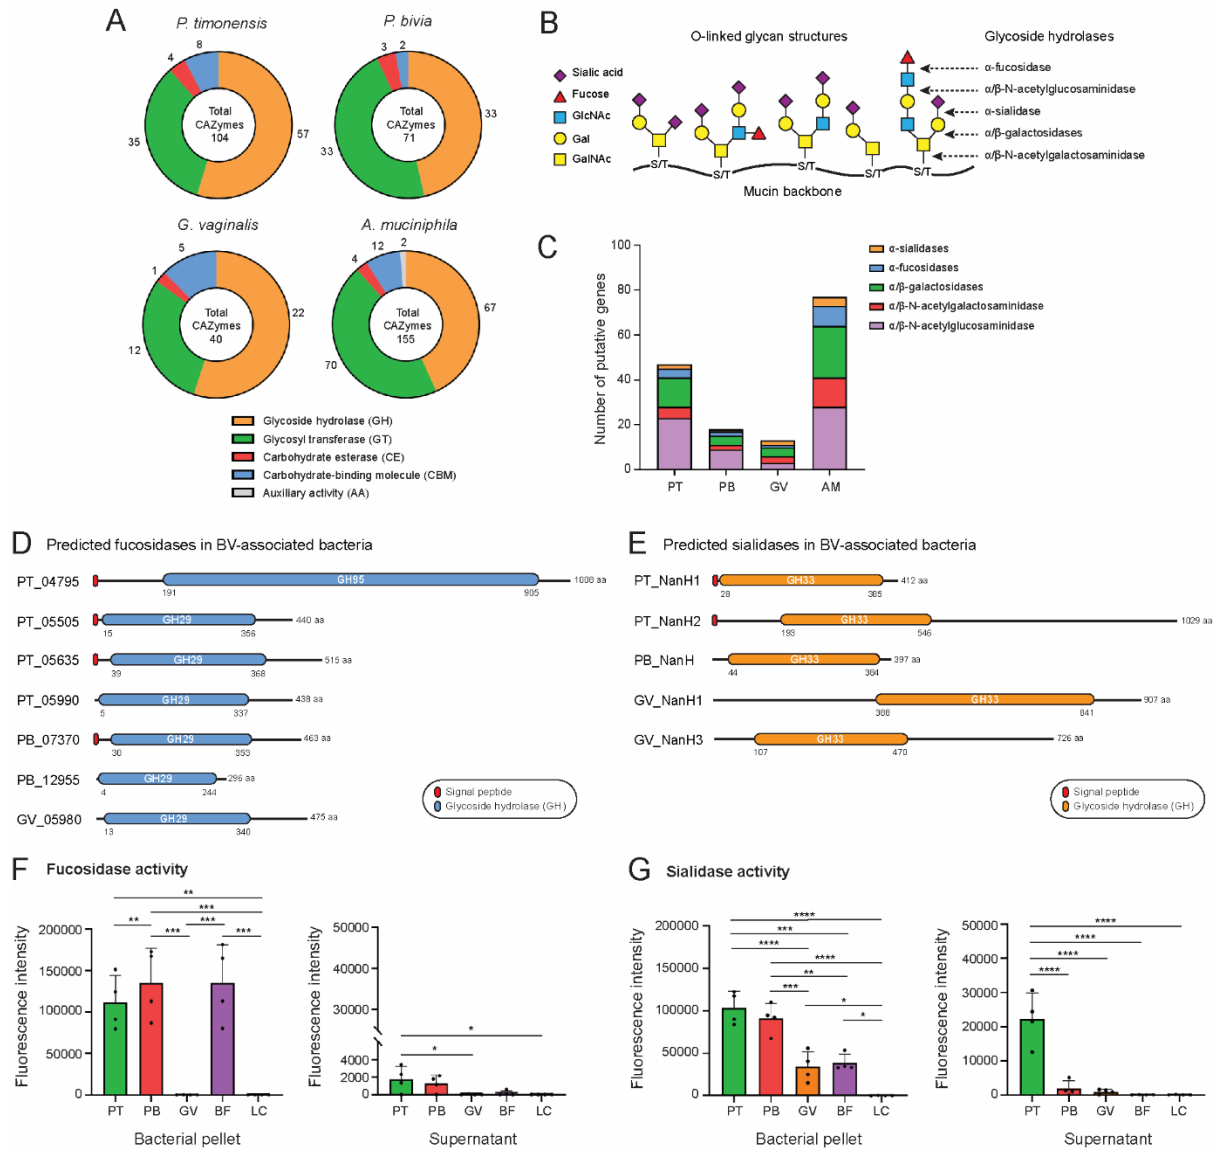

500  
501

502 **Figure 4. High mucin degradation potential in *Prevotella timonensis*.** (A) Abundance of predicted  
503 carbohydrate-active enzymes (CAZymes) families in the sequenced genomes of our *P. timonensis*, *P.*  
504 *bivia*, *G. vaginalis* and *A. muciniphila* strains. (B) Schematic representation of a mucin glycoprotein  
505 molecule with protein backbone and diverse O-glycan structures. Target sites for different classes of  
506 glycosyl hydrolases are depicted. (C) Number of identified O-glycan-targeting CAZymes in the  
507 genomes of the sequenced *P. timonensis* (PT), *P. bivia* (PB), *G. vaginalis* (GV), and *A. muciniphila*  
508 (AM) strains. (D-E) Domain architecture of the predicted (D) fucosidases and (E) sialidases of the  
509 designated bacteria. The displayed domains are identified by HMMER, Diamond, and Signal IP 6.0  
510 tools and drawn to scale. (F) Fucosidase and (G) sialidase activities measured in bacterial pellets and  
511 supernatants of the different BV-associated bacteria and *B. fragilis* as positive control. Abbreviations:  
512 PT (*P. timonensis*), PB (*P. bivia*), GV (*G. vaginalis*), BF (*B. fragilis*), and LC (*L. crispatus*). The graph  
513 represents the average and +/- SEM of four independent experiments.



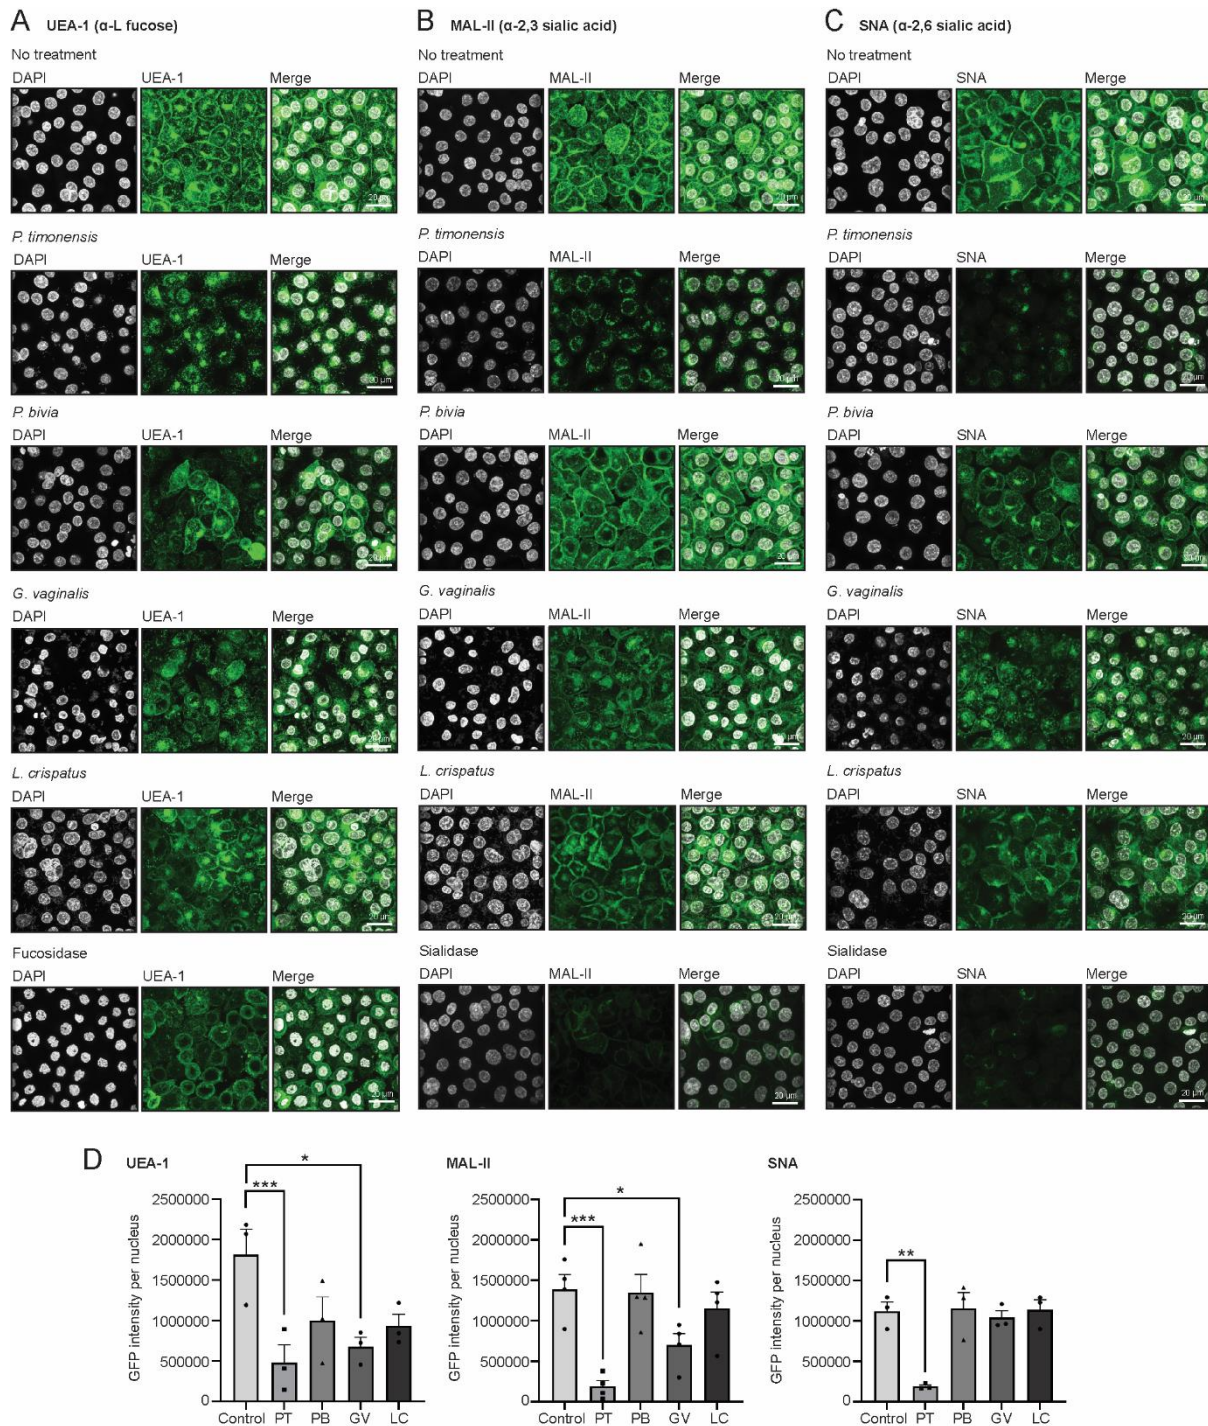

514  
515

516 **Figure 5. *Prevotella timonensis* effectively removes glycans from the vaginal epithelial surface.**  
 517 Fluorescence confocal microscopy images of mucin O-glycan structures after incubation with *P.*  
 518 *timonensis*, *P. bivia*, *G. vaginalis*, or *L. crispatus* at a MOI 10 for 18 hours anaerobically. Neuraminidase  
 519 A and L-fucosidase were added for 3 h as positive controls for sialidase and fucosidases activity. (A)  
 520 UEA-1 ( $\alpha$ -L fucoses), (B) MAL-II ( $\alpha$ -2,3 sialic acids), and (C) SNA ( $\alpha$ -2,6 sialic acids) stainings are  
 521 shown in green, and DAPI in white. White scale bars represent 20  $\mu$ M. (D) Quantification of UEA-1,  
 522 MAL-II, and SNA stainings from figure 5A-C. The graph represents the average and  $\pm$  SEM of at  
 523 least three independent experiments.

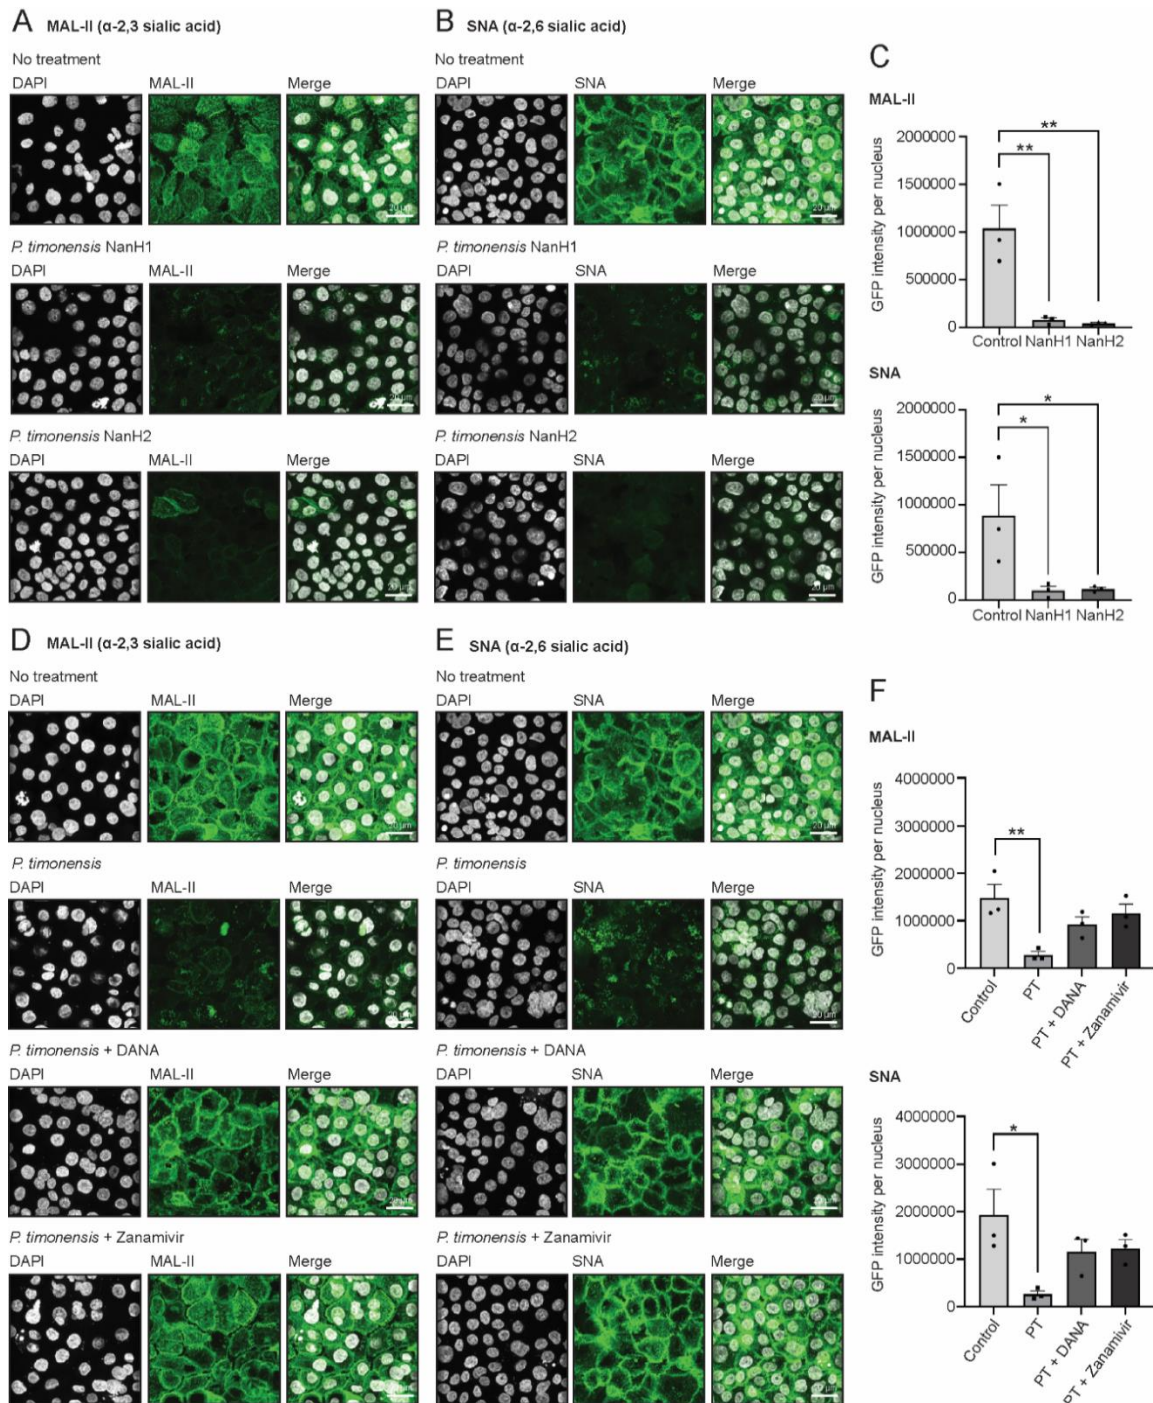

524  
525

526 **Figure 6. *P. timonensis* sialidase activity at the vaginal mucosal surface can be inhibited by the**  
 527 **sialidase inhibitors DANA and Zanamivir.** Fluorescence confocal microscopy images of sialic acid  
 528 staining after incubation with 1  $\mu$ M of recombinant *P. timonensis* sialidases NanH1 and NanH2 for 3  
 529 hours anaerobically. (A) MAL-II ( $\alpha$ -2,3 sialic acids) and (B) SNA ( $\alpha$ -2,6 sialic acids) stainings are  
 530 shown in green and DAPI in white. White scale bars represent 20  $\mu$ M. (C) Quantification of MAL-II  
 531 and SNA stainings from figure 6A-B. Fluorescence microscopy images of (D) MAL-II ( $\alpha$ -2,3 sialic  
 532 acids) and (E) SNA ( $\alpha$ -2,6 sialic acids) after *P. timonensis* infection at a MOI 10 for 18 hours  
 533 anaerobically in the presence/absence of 1 mM DANA or Zanamivir. Lectin stainings are shown in  
 534 green and DAPI in white. White scale bars represent 20  $\mu$ M. (F) Quantification of MAL-II and SNA

535 stainings from figure 6D-E. The graph represents the average and +/- SEM of three independent  
536 experiments.

537 **References**

- 538 1. C. R. Cohen, J. R. Lingappa, J. M. Baeten, M. O. Ngayo, C. A. Spiegel, T. Hong, D. Donnell, C.  
539 Celum, S. Kapiga, S. Delany, E. A. Bukusi, Bacterial Vaginosis Associated with Increased Risk  
540 of Female-to-Male HIV-1 Transmission: A Prospective Cohort Analysis among African  
541 Couples. *PLoS Med* **9**, e1001251 (2012).
- 542 2. K. Nava-Memije, C. Hernández-Cortez, V. Ruiz-González, C. Saldaña-Juárez, Y. Medina-Islas,  
543 R. Dueñas-Domínguez, G. Aguilera, Bacterial Vaginosis and Sexually Transmitted Infections in  
544 an HIV-Positive Cohort. *Frontiers in Reproductive Health* **3**, 660672 (2021).
- 545 3. E. Gillet, J. F. Meys, H. Verstraelen, C. Bosire, P. De Sutter, M. Temmerman, D. V. Broeck,  
546 Bacterial vaginosis is associated with uterine cervical human papillomavirus infection: a meta-  
547 analysis. *BMC Infect Dis* **11**, 10 (2011).
- 548 4. J. Ravel, I. Moreno, C. Simón, Bacterial vaginosis and its association with infertility,  
549 endometritis, and pelvic inflammatory disease. *Am J Obstet Gynecol* **224**, 251–257 (2021).
- 550 5. A. S. Dingens, T. S. Fairfortune, S. Reed, C. Mitchell, Bacterial vaginosis and adverse outcomes  
551 among full-term infants: a cohort study. *BMC Pregnancy and Childbirth* **16**, 278 (2016).
- 552 6. R. Amsel, P. A. Totten, C. A. Spiegel, K. C. Chen, D. Eschenbach, K. K. Holmes, Nonspecific  
553 vaginitis. Diagnostic criteria and microbial and epidemiologic associations. *Am J Med* **74**, 14–22  
554 (1983).
- 555 7. F. Mohammadzadeh, M. Dolatian, M. Jorjani, H. A. Majd, Diagnostic Value of Amsel's  
556 Clinical Criteria for Diagnosis of Bacterial Vaginosis. *Glob J Health Sci* **7**, 8–14 (2015).
- 557 8. R. P. Nugent, M. A. Krohn, S. L. Hillier, Reliability of diagnosing bacterial vaginosis is  
558 improved by a standardized method of gram stain interpretation. *J Clin Microbiol* **29**, 297–301  
559 (1991).
- 560 9. J. S. Coleman, C. A. Gaydos, Molecular Diagnosis of Bacterial Vaginosis: an Update. *J Clin*  
561 *Microbiol* **56**, e00342-18 (2018).
- 562 10. A. M. Briselden, B. J. Moncla, C. E. Stevens, S. L. Hillier, Sialidases (neuraminidases) in  
563 bacterial vaginosis and bacterial vaginosis-associated microflora. *J Clin Microbiol* **30**, 663–666  
564 (1992).
- 565 11. S. S. Olmsted, L. A. Meyn, L. C. Rohan, S. L. Hillier, Glycosidase and proteinase activity of  
566 anaerobic gram-negative bacteria isolated from women with bacterial vaginosis. *Sex Transm Dis*  
567 **30**, 257–261 (2003).
- 568 12. C. S. T. Ferreira, C. Marconi, C. M. G. L. Parada, J. Ravel, M. G. da Silva, Sialidase Activity in  
569 the Cervicovaginal Fluid Is Associated With Changes in Bacterial Components of  
570 Lactobacillus-Deprived Microbiota. *Front Cell Infect Microbiol* **11**, 813520 (2021).
- 571 13. X. Chen, Y. Lu, T. Chen, R. Li, The Female Vaginal Microbiome in Health and Bacterial  
572 Vaginosis. *Front Cell Infect Microbiol* **11**, 631972 (2021).
- 573 14. D. E. O'Hanlon, T. R. Moench, R. A. Cone, Vaginal pH and Microbicidal Lactic Acid When  
574 Lactobacilli Dominate the Microbiota. *PLoS ONE* **8**, e80074 (2013).
- 575 15. T. L. Cherpes, S. L. Hillier, L. A. Meyn, J. L. Busch, M. A. Krohn, A delicate balance: risk  
576 factors for acquisition of bacterial vaginosis include sexual activity, absence of hydrogen

- 577 peroxide-producing lactobacilli, black race, and positive herpes simplex virus type 2 serology.  
578 *Sex Transm Dis* **35**, 78–83 (2008).
- 579 16. G. Stoyancheva, M. Marzotto, F. Dellaglio, S. Torriani, Bacteriocin production and gene  
580 sequencing analysis from vaginal *Lactobacillus* strains. *Arch Microbiol* **196**, 645–653 (2014).
- 581 17. V. Rousseau, J. P. Lepargneur, C. Roques, M. Remaud-Simeon, F. Paul, Prebiotic effects of  
582 oligosaccharides on selected vaginal lactobacilli and pathogenic microorganisms. *Anaerobe* **11**,  
583 145–153 (2005).
- 584 18. D. N. Fredricks, T. L. Fiedler, J. M. Marrazzo, Molecular identification of bacteria associated  
585 with bacterial vaginosis. *N Engl J Med* **353**, 1899–1911 (2005).
- 586 19. Z. Ling, J. Kong, F. Liu, H. Zhu, X. Chen, Y. Wang, L. Li, K. E. Nelson, Y. Xia, C. Xiang,  
587 Molecular analysis of the diversity of vaginal microbiota associated with bacterial vaginosis.  
588 *BMC Genomics* **11**, 488 (2010).
- 589 20. C. A. Muzny, E. Blanchard, C. M. Taylor, K. J. Aaron, R. Talluri, M. E. Griswold, D. T.  
590 Redden, M. Luo, D. A. Welsh, W. J. Van Der Pol, E. J. Lefkowitz, D. H. Martin, J. R.  
591 Schwebke, Identification of Key Bacteria Involved in the Induction of Incident Bacterial  
592 Vaginosis: A Prospective Study. *J Infect Dis* **218**, 966–978 (2018).
- 593 21. M. Peeters, P. Piot, Adhesion of *Gardnerella vaginalis* to vaginal epithelial cells: variables  
594 affecting adhesion and inhibition by metronidazole. *Genitourin Med* **61**, 391–395 (1985).
- 595 22. J. L. Patterson, A. Stull-Lane, P. H. Girerd, K. K. Jefferson, Analysis of adherence, biofilm  
596 formation and cytotoxicity suggests a greater virulence potential of *Gardnerella vaginalis*  
597 relative to other bacterial-vaginosis-associated anaerobes. *Microbiology (Reading)* **156**, 392–  
598 399 (2010).
- 599 23. P. Alves, J. Castro, C. Sousa, T. B. Cereija, N. Cerca, *Gardnerella vaginalis* outcompetes 29  
600 other bacterial species isolated from patients with bacterial vaginosis, using in an in vitro  
601 biofilm formation model. *J Infect Dis* **210**, 593–596 (2014).
- 602 24. A. Machado, N. Cerca, Influence of Biofilm Formation by *Gardnerella vaginalis* and Other  
603 Anaerobes on Bacterial Vaginosis. *J Infect Dis* **212**, 1856–1861 (2015).
- 604 25. P. Bhandari, J. E. Hill, Transport and Utilization of Glycogen Breakdown Products by  
605 *Gardnerella* spp. from the Human Vaginal Microbiome. *Microbiol Spectr* **11**, e0443522 (2023).
- 606 26. P. Bhandari, J. P. Tingley, D. R. J. Palmer, D. W. Abbott, J. E. Hill, Characterization of an  $\alpha$ -  
607 Glucosidase Enzyme Conserved in *Gardnerella* spp. Isolated from the Human Vaginal  
608 Microbiome. *J Bacteriol* **203**, e00213-21.
- 609 27. N. M. Gilbert, W. G. Lewis, G. Li, D. K. Sojka, J. B. Lubin, A. L. Lewis, *Gardnerella vaginalis*  
610 and *Prevotella bivia* Trigger Distinct and Overlapping Phenotypes in a Mouse Model of  
611 Bacterial Vaginosis. *J Infect Dis* **220**, 1099–1108 (2019).
- 612 28. K. Agarwal, A. L. Lewis, Vaginal sialoglycan foraging by *Gardnerella vaginalis*: mucus barriers  
613 as a meal for unwelcome guests? *Glycobiology* **31**, 667–680 (2021).
- 614 29. S. Cauci, R. Monte, M. Ropele, C. Missero, T. Not, F. Quadrifoglio, G. Menestrina, Pore-  
615 forming and haemolytic properties of the *Gardnerella vaginalis* cytolysin. *Mol Microbiol* **9**,  
616 1143–1155 (1993).

- 617 30. E. M. Garcia, V. Kraskauskienė, J. E. Koblinski, K. K. Jefferson, Interaction of *Gardnerella*  
618 *vaginalis* and Vaginolysin with the Apical versus Basolateral Face of a Three-Dimensional  
619 Model of Vaginal Epithelium. *Infect Immun* **87**, e00646-18 (2019).
- 620 31. A. Swidsinski, Y. Doerffel, V. Loening-Baucke, S. Swidsinski, H. Verstraelen, M.  
621 Vaneechoutte, V. Lemm, J. Schilling, W. Mendling, *Gardnerella* biofilm involves females and  
622 males and is transmitted sexually. *Gynecol Obstet Invest* **70**, 256–263 (2010).
- 623 32. R. J. Hickey, L. J. Forney, *Gardnerella vaginalis* does not always cause Bacterial Vaginosis. *J*  
624 *Infect Dis* **210**, 1682–1683 (2014).
- 625 33. J. Castro, P. Alves, C. Sousa, T. Cereija, Â. França, K. K. Jefferson, N. Cerca, Using an in-vitro  
626 biofilm model to assess the virulence potential of Bacterial Vaginosis or non-Bacterial  
627 Vaginosis *Gardnerella vaginalis* isolates. *Sci Rep* **5**, 11640 (2015).
- 628 34. V. Pybus, A. B. Onderdonk, Evidence for a commensal, symbiotic relationship between  
629 *Gardnerella vaginalis* and *Prevotella bivia* involving ammonia: potential significance for  
630 bacterial vaginosis. *J Infect Dis* **175**, 406–413 (1997).
- 631 35. S. Srinivasan, N. G. Hoffman, M. T. Morgan, F. A. Matsen, T. L. Fiedler, R. W. Hall, F. J.  
632 Ross, C. O. McCoy, R. Bumgarner, J. M. Marrazzo, D. N. Fredricks, Bacterial Communities in  
633 Women with Bacterial Vaginosis: High Resolution Phylogenetic Analyses Reveal Relationships  
634 of Microbiota to Clinical Criteria. *PLoS One* **7**, e37818 (2012).
- 635 36. C. Elwood, A. Albert, E. McClymont, E. Wagner, D. Mahal, K. Devakandan, B. L. Quiqley, Z.  
636 Pakzad, M. H. Yudin, J. E. Hill, D. Money, VOGUE Research Group, Different and diverse  
637 anaerobic microbiota were seen in women living with HIV with unsuppressed HIV viral load  
638 and in women with recurrent bacterial vaginosis: a cohort study. *BJOG* **127**, 250–259 (2020).
- 639 37. O. St. E. Roachford, A. T. Alleyne, C. Kuelbs, M. G. Torralba, K. E. Nelson, The  
640 cervicovaginal microbiome and its resistome in a random selection of Afro-Caribbean women.  
641 *Human Microbiome Journal* **20**, 100079 (2021).
- 642 38. J. Gao, Y. Peng, N. Jiang, Y. Shi, C. Ying, High-Throughput Sequencing-Based Analysis of  
643 Changes in the Vaginal Microbiome during the Disease Course of Patients with Bacterial  
644 Vaginosis: A Case-Control Study. *Biology (Basel)* **11**, 1797 (2022).
- 645 39. T. C. A. Hitch, K. Bisdorf, A. Afrizal, T. Riedel, J. Overmann, T. Strowig, T. Clavel, A  
646 taxonomic note on the genus *Prevotella*: Description of four novel genera and emended  
647 description of the genera *Hallella* and *Xylanibacter*. *Systematic and Applied Microbiology* **45**,  
648 126354 (2022).
- 649 40. Z. E. Ilhan, P. Łaniewski, A. Tonachio, M. M. Herbst-Kralovetz, Members of *Prevotella* Genus  
650 Distinctively Modulate Innate Immune and Barrier Functions in a Human Three-Dimensional  
651 Endometrial Epithelial Cell Model. *J Infect Dis* **222**, 2082–2092 (2020).
- 652 41. M. N. Anahtar, E. H. Byrne, K. E. Doherty, B. A. Bowman, H. S. Yamamoto, M. Soumillon, N.  
653 Padavattan, N. Ismail, A. Moodley, M. E. Sabatini, M. S. Ghebremichael, C. Nusbaum, C.  
654 Huttenhower, H. W. Virgin, T. Ndung'u, K. L. Dong, B. D. Walker, R. N. Fichorova, D. S.  
655 Kwon, Cervicovaginal Bacteria Are a Major Modulator of Host Inflammatory Responses in the  
656 Female Genital Tract. *Immunity* **42**, 965–976 (2015).
- 657 42. J. K. Kyongo, T. Crucitti, J. Menten, L. Hardy, P. Cools, J. Michiels, S. Delany-Moretlwe, M.  
658 Mwaura, G. Ndayisaba, S. Joseph, R. Fichorova, J. van de Wijgert, G. Vanham, K. K. Ariën, V.  
659 Jaspers, Cross-Sectional Analysis of Selected Genital Tract Immunological Markers and

- 660 Molecular Vaginal Microbiota in Sub-Saharan African Women, with Relevance to HIV Risk  
661 and Prevention. *Clin Vaccine Immunol* **22**, 526–538 (2015).
- 662 43. C. Gosmann, M. N. Anahtar, S. A. Handley, M. Farcasanu, G. Abu-Ali, B. A. Bowman, N.  
663 Padavattan, C. Desai, L. Droit, A. Moodley, M. Dong, Y. Chen, N. Ismail, T. Ndung’u, M. S.  
664 Ghebremichael, D. R. Wesemann, C. Mitchell, K. L. Dong, C. Huttenhower, B. D. Walker, H.  
665 W. Virgin, D. S. Kwon, Lactobacillus-Deficient Cervicovaginal Bacterial Communities Are  
666 Associated with Increased HIV Acquisition in Young South African Women. *Immunity* **46**, 29–  
667 37 (2017).
- 668 44. N. H. van Teijlingen, L. C. Helgers, E. M. Zijlstra-Willems, J. L. van Hamme, C. M. S. Ribeiro,  
669 K. Strijbis, T. B. H. Geijtenbeek, Vaginal dysbiosis associated-bacteria *Megasphaera elsdenii*  
670 and *Prevotella timonensis* induce immune activation via dendritic cells. *J Reprod Immunol* **138**,  
671 103085 (2020).
- 672 45. N. H. Van Teijlingen, L. C. Helgers, R. Sarrami-Forooshani, E. M. Zijlstra-Willems, J. L. Van  
673 Hamme, C. Segui-Perez, M. Y. Van Smoorenburg, H. Borgdorff, J. H. Van De Wijgert, E. Van  
674 Leeuwen, J. A. Van Der Post, K. Strijbis, C. M. Ribeiro, T. B. Geijtenbeek, Vaginal bacterium  
675 *Prevotella timonensis* turns protective Langerhans cells into HIV -1 reservoirs for virus  
676 dissemination. *The EMBO Journal* **41**, e110629 (2022).
- 677 46. L. Hardy, V. Jespers, S. Abdellati, I. De Baetselier, L. Mwambarangwe, V. Musengamana, J.  
678 van de Wijgert, M. Vaneechoutte, T. Crucitti, A fruitful alliance: the synergy between  
679 *Atopobium vaginae* and *Gardnerella vaginalis* in bacterial vaginosis-associated biofilm. *Sex*  
680 *Transm Infect* **92**, 487–491 (2016).
- 681 47. S. K. Sakthivel, U. P. Singh, S. Singh, D. D. Taub, J. U. Igietseme, J. W. Lillard, CCL5  
682 regulation of mucosal chlamydial immunity and infection. *BMC Microbiology* **8**, 136 (2008).
- 683 48. A. T. Gregoire, O. Kandil, W. J. Ledger, The glycogen content of human vaginal epithelial  
684 tissue. *Fertil Steril* **22**, 64–68 (1971).
- 685 49. E. Amabebe, D. O. C. Anumba, The Vaginal Microenvironment: The Physiologic Role of  
686 Lactobacilli. *Front Med (Lausanne)* **5**, 181 (2018).
- 687 50. D. J. Jenkins, B. M. Woolston, M. I. Hood-Pishchany, P. Pelayo, A. N. Konopaski, M. Quinn  
688 Peters, M. T. France, J. Ravel, C. M. Mitchell, S. Rakoff-Nahoum, C. Whidbey, E. P. Balskus,  
689 Bacterial amylases enable glycogen degradation by the vaginal microbiome. *Nat Microbiol* **8**,  
690 1641–1652 (2023).
- 691 51. M. Adnane, K. G. Meade, C. O’Farrelly, Cervico-vaginal mucus (CVM) – an accessible source  
692 of immunologically informative biomolecules. *Vet Res Commun* **42**, 255–263 (2018).
- 693 52. H. Zhang, T. Yohe, L. Huang, S. Entwistle, P. Wu, Z. Yang, P. K. Busk, Y. Xu, Y. Yin,  
694 dbCAN2: a meta server for automated carbohydrate-active enzyme annotation. *Nucleic Acids*  
695 *Res* **46**, W95–W101 (2018).
- 696 53. K. S. B. Bergstrom, L. Xia, Mucin-type O-glycans and their roles in intestinal homeostasis.  
697 *Glycobiology* **23**, 1026–1037 (2013).
- 698 54. L. S. Robinson, J. Schwebke, W. G. Lewis, A. L. Lewis, Identification and characterization of  
699 NanH2 and NanH3, enzymes responsible for sialidase activity in the vaginal bacterium  
700 *Gardnerella vaginalis*. *J Biol Chem* **294**, 5230–5245 (2019).

- 701 55. N. Polanco, L. Manzi, O. Carmona, [Possible role of enterotoxigenic *Bacteroides fragilis* in the  
702 etiology of infectious vaginitis]. *Invest Clin* **53**, 28–37 (2012).
- 703 56. J. Paavonen, V. V. Valtonen, D. L. Kasper, M. Malkamäki, P. H. Mäkelä, Serological evidence  
704 for the role of *Bacteroides fragilis* and enterobacteriaceae in the pathogenesis of acute pelvic  
705 inflammatory disease. *Lancet* **1**, 293–295 (1981).
- 706 57. D. L. Kasper, D. A. Eschenbach, M. E. Hayes, K. K. Holmes, Quantitative determination of the  
707 serum antibody response to the capsular polysaccharide of *Bacteroides fragilis* subspecies  
708 *fragilis* in women with pelvic inflammatory disease. *J Infect Dis* **138**, 74–80 (1978).
- 709 58. J. A. McGregor, J. I. French, W. Jones, K. Milligan, P. J. McKinney, E. Patterson, R. Parker,  
710 Bacterial vaginosis is associated with prematurity and vaginal fluid mucinase and sialidase:  
711 results of a controlled trial of topical clindamycin cream. *Am J Obstet Gynecol* **170**, 1048–1059;  
712 discussion 1059-1060 (1994).
- 713 59. J. Smayevsky, L. F. Canigia, A. Lanza, H. Bianchini, Vaginal microflora associated with  
714 bacterial vaginosis in nonpregnant women: reliability of sialidase detection. *Infect Dis Obstet*  
715 *Gynecol* **9**, 17–22 (2001).
- 716 60. G. Lopes Dos Santos Santiago, I. Tency, H. Verstraelen, R. Verhelst, M. Trog, M. Temmerman,  
717 L. Vancoillie, E. Decat, P. Cools, M. Vaneechoutte, Longitudinal qPCR Study of the Dynamics  
718 of *L. crispatus*, *L. iners*, *A. vaginae*, (Sialidase Positive) *G. vaginalis*, and *P. bivia* in the Vagina.  
719 *PLoS ONE* **7**, e45281 (2012).
- 720 61. W. G. Lewis, L. S. Robinson, N. M. Gilbert, J. C. Perry, A. L. Lewis, Degradation, foraging,  
721 and depletion of mucus sialoglycans by the vagina-adapted Actinobacterium *Gardnerella*  
722 *vaginalis*. *J Biol Chem* **288**, 12067–12079 (2013).
- 723 62. L. Hardy, V. Jaspers, M. Van Den Bulck, J. Buyze, L. Mwambarangwe, V. Musengamana, M.  
724 Vaneechoutte, T. Crucitti, The presence of the putative *Gardnerella vaginalis* sialidase A gene in  
725 vaginal specimens is associated with bacterial vaginosis biofilm. *PLoS ONE* **12**, e0172522  
726 (2017).
- 727 63. K. V. Lithgow, V. C. H. Buchholz, E. Ku, S. Kenschuh, A. D’Aubeterre, L. K. Sycuro, Protease  
728 activities of vaginal *Porphyromonas* species disrupt coagulation and extracellular matrix in the  
729 cervicovaginal niche. *NPJ Biofilms Microbiomes* **8**, 8 (2022).
- 730 64. K. Agarwal, B. Choudhury, L. S. Robinson, S. R. Morrill, Y. Bouchibiti, D. Chilin-Fuentes, S.  
731 B. Rosenthal, K. M. Fisch, J. F. Peipert, C. B. Lebrilla, J. E. Allsworth, A. L. Lewis, W. G.  
732 Lewis, Resident microbes shape the vaginal epithelial glycan landscape. *Sci Transl Med* **15**,  
733 eabp9599 (2023).
- 734 65. B. Shuoker, M. J. Pichler, C. Jin, H. Sakanaka, H. Wu, A. M. Gascueña, J. Liu, T. S. Nielsen, J.  
735 Holgersson, E. Nordberg Karlsson, N. Juge, S. Meier, J. P. Morth, N. G. Karlsson, M. Abou  
736 Hachem, Sialidases and fucosidases of *Akkermansia muciniphila* are crucial for growth on  
737 mucin and nutrient sharing with mucus-associated gut bacteria. *Nat Commun* **14**, 1833 (2023).
- 738 66. O. J. Ogun, G. Thaller, D. Becker, An Overview of the Importance and Value of Porcine  
739 Species in Sialic Acid Research. *Biology* **11**, 903 (2022).
- 740 67. M. Dean, Glycogen in the uterus and fallopian tubes is an important source of glucose during  
741 early pregnancy†. *bire* **101**, 297–305 (2019).



- 742 68. P. Mirmonsef, D. Gilbert, R. S. Veazey, J. Wang, S. R. Kendrick, G. T. Spear, A Comparison of  
743 Lower Genital Tract Glycogen and Lactic Acid Levels in Women and Macaques: Implications  
744 for HIV and SIV Susceptibility. *AIDS Res Hum Retroviruses* **28**, 76–81 (2012).
- 745 69. P. Mirmonsef, A. L. Hotton, D. Gilbert, D. Burgad, A. Landay, K. M. Weber, M. Cohen, J.  
746 Ravel, G. T. Spear, Free Glycogen in Vaginal Fluids Is Associated with Lactobacillus  
747 Colonization and Low Vaginal pH. *PLoS One* **9**, e102467 (2014).
- 748 70. K. L. Nunn, B. J. Ridenhour, E. M. Chester, V. J. Vitzthum, J. D. Fortenberry, L. J. Fomey,  
749 Vaginal glycogen, not estradiol, is associated with vaginal bacterial community composition in  
750 Black adolescent women. *J Adolesc Health* **65**, 130–138 (2019).
- 751 71. C. van der Veer, R. Y. Hertzberger, S. M. Bruisten, H. L. P. Tytgat, J. Swanenburg, A. de Kat  
752 Angelino-Bart, F. Schuren, D. Molenaar, G. Reid, H. de Vries, R. Kort, Comparative genomics  
753 of human Lactobacillus crispatus isolates reveals genes for glycosylation and glycogen  
754 degradation: implications for in vivo dominance of the vaginal microbiota. *Microbiome* **7**, 49  
755 (2019).
- 756 72. R. Hertzberger, A. May, G. Kramer, I. Van Vondelen, D. Molenaar, R. Kort, Genetic Elements  
757 Orchestrating Lactobacillus crispatus Glycogen Metabolism in the Vagina. *IJMS* **23**, 5590  
758 (2022).
- 759 73. C. S. Bradshaw, S. N. Tabrizi, C. K. Fairley, A. N. Morton, E. Rudland, S. M. Garland, The  
760 association of Atopobium vaginae and Gardnerella vaginalis with bacterial vaginosis and  
761 recurrence after oral metronidazole therapy. *J Infect Dis* **194**, 828–836 (2006).
- 762 74. J. Castro, D. Machado, N. Cerca, Unveiling the role of Gardnerella vaginalis in polymicrobial  
763 Bacterial Vaginosis biofilms: the impact of other vaginal pathogens living as neighbors. *ISME J*  
764 **13**, 1306–1317 (2019).
- 765 75. R. Wiggins, S. Hicks, P. Soothill, M. Millar, A. Corfield, Mucinases and sialidases: their role in  
766 the pathogenesis of sexually transmitted infections in the female genital tract. *Sex Transm Infect*  
767 **77**, 402–408 (2001).
- 768 76. S. Cauci, S. Driussi, D. De Santo, P. Penacchioni, T. Iannicelli, P. Lanzafame, F. De Seta, F.  
769 Quadrifoglio, D. de Aloysio, S. Guaschino, Prevalence of bacterial vaginosis and vaginal flora  
770 changes in peri- and postmenopausal women. *J Clin Microbiol* **40**, 2147–2152 (2002).
- 771 77. P. Shishpal, N. Kasarpalkar, D. Singh, V. M. Bhor, Characterization of Gardnerella vaginalis  
772 membrane vesicles reveals a role in inducing cytotoxicity in vaginal epithelial cells. *Anaerobe*  
773 **61**, 102090 (2020).
- 774 78. L. Strombeck, J. Sandors, E. Holst, P. Madianos, U. Nannmark, P. Papapanou, I. Mattsby-  
775 Baltzer, Prevotella bivia can invade human cervix epithelial (HeLa) cells. *APMIS: acta*  
776 *pathologica, microbiologica, et immunologica Scandinavica* **115**, 241–251 (2007).
- 777 79. S. Y. Doerflinger, A. L. Throop, M. M. Herbst-Kralovetz, Bacteria in the vaginal microbiome  
778 alter the innate immune response and barrier properties of the human vaginal epithelia in a  
779 species-specific manner. *J Infect Dis* **209**, 1989–1999 (2014).
- 780 80. E. K. Libby, K. E. Pascal, E. Mordechai, M. E. Adelson, J. P. Trama, Atopobium vaginae  
781 triggers an innate immune response in an in vitro model of bacterial vaginosis. *Microbes Infect*  
782 **10**, 439–446 (2008).

- 783 81. G. Govinden, J. L. Parker, K. L. Naylor, A. M. Frey, D. O. C. Anumba, G. P. Stafford,  
784 Inhibition of sialidase activity and cellular invasion by the bacterial vaginosis pathogen  
785 *Gardnerella vaginalis*. *Arch Microbiol* **200**, 1129–1133 (2018).
- 786 82. A. Machado, C. Almeida, D. Salgueiro, A. Henriques, M. Vaneechoutte, F. Haesebrouck, M. J.  
787 Vieira, L. Rodrigues, N. F. Azevedo, N. Cerca, Fluorescence in situ Hybridization method using  
788 Peptide Nucleic Acid probes for rapid detection of *Lactobacillus* and *Gardnerella* spp. *BMC*  
789 *Microbiology* **13**, 82 (2013).
- 790 83. R. I. Amann, B. J. Binder, R. J. Olson, S. W. Chisholm, R. Devereux, D. A. Stahl, Combination  
791 of 16S rRNA-targeted oligonucleotide probes with flow cytometry for analyzing mixed  
792 microbial populations. *Appl Environ Microbiol* **56**, 1919–1925 (1990).
- 793
